# Supplementary material
Source: PubMed Central journal article supplement (PMC4121823)
Supplement: 1405298111_pnas.201405298SI.pdf [file 1405298111_pnas.201405298SI.pdf]

# Supporting Information

Wrzesniewski et al. 10.1073/pnas.1405298111

## SI Materials and Methods

**Participants.** A total of 11,320 incoming cadets from 10 consecutive entering class years (the classes of 1997–2006) at West Point provided data. We had complete data for 9 of those 10 classes, as the Class of 2003 was not provided with the correct response categories for the survey items in question. Thus, 10,239 cadets were retained in the data analysis reported here. The measures analyzed were taken as part of standard surveys administered by West Point in the beginning of the first year of study. Participants were 15.1% female, 78.6% White, and 21.4% non-White. This was the sample used to determine the factor structure underlying cadets' reasons for attending West Point and to analyze who successfully graduated and became commissioned Army officers. Of the 10,239 participants for whom we had complete data upon entry at West Point, 7,868 graduated and became commissioned officers. For the subsequent analyses predicting officer retention following their 5-y mandatory commitment, we were able to secure data for 7,663 participants, who were 13.7% female, 79.5% White and 20.5% non-White. The remaining cases were not retained in the Army data or failed to achieve a matched identification of the case. For analyses predicting whether participants were considered for potential early promotion, we secured data for 7,862 participants (data were missing for the remaining 6 participants). The final two West Point classes in the sample did not have any data recorded for whether participants were considered for potential early promotion, reducing our sample for that analysis to 6,162 participants who were 14.0% female, 80.1% White and 19.9% Non-White. Table S1 shows all demographic control data used in the analyses.

**Procedure.** Incoming cadets at West Point routinely complete several survey instruments as part of their transition into the institution. The authors secured permission to use data from two instruments administered at the start of cadets' first year at West Point. Incoming cadets completed two survey instruments that assessed their reasons for attending West Point. The two instruments used different response formats. The first measure consisted of 11 questions and used a five-point scale to indicate whether the reason listed was: (v) a "Number one priority or most important consideration"; (iv) "A major consideration"; (iii) "A factor but not a major consideration"; (ii) "A minor consideration"; or (i) "Irrelevant or not applicable". The second measure consisted of 31 questions and used a three-point Likert-type scale to indicate whether the reason listed as: (i) "Very important"; (ii) "Somewhat important"; or (iii) "Not important". We combined the two scales by recoding reasons from the first measure that were rated as 4 or 5 (most important or major consideration) to be "very important," whereas recoding 3 (a factor but not a major consideration) as "somewhat important" and 1 and 2 (a minor consideration or irrelevant) as "not important," so that all items were coded using the same three-point scale.

Data for the first survey instrument were not included from the Class of 2003 because the institution did not ask these questions of that class. We also eliminated 11 items that were not included across all 10 y of the survey. The remaining 31 items were included in an explanatory factor analysis (EFA) run on the complete dataset. We used the full dataset to estimate the number of factors underpinning the 31 items and to remove those items that failed to load on any factor (i.e., an absolute loading of less than 0.30). The EFA analysis revealed five factors with eigenvalues close to 5,

and two more with eigenvalues close to 1. Table S2 shows the EFA results with six factors. Seven questions failed to load significantly on any factor and were removed from further EFA analysis.

We then conducted a random split of the dataset to carry out the EFA on both halves of the data ( $n = 5,120$  and  $n = 5,119$ , respectively) using the remaining 24 items. The results of both EFAs suggested six factors with at least three items loading on each at an absolute value of 0.30 or higher. We chose a six-factor model as the seven-factor model included factors with less than three items as well as several cross-loaded items. The six-factor model fit the data well based on the tests of model fit summarized in Table S3. Table S4 shows the item loadings for the EFAs conducted on each half of the data. The factors reflect (i) family influence, (ii) economic need, (iii) instrumental aims or expectations, (iv) internal desire to become an Army officer and leader, (v) others' influence, and (vi) to gain study skills/become more cultured. This factor structure was stable and highly similar using either orthogonal (Varimax) or oblique (Quartimin) rotation.

The EFA was followed by a confirmatory factor analysis (CFA) run on the second half of the data ( $n = 5,119$ ) using the EFA results from the first half of the data ( $n = 5,120$ ), and a CFA run on the first half of the data using the EFA results from the second half of the data. We compared the two models that resulted to determine the final model, which was tested on the full dataset, as well as on both halves of the data run separately. To refine the model, the possibility for correlations among the factors was taken into account. Thus, rather than using orthogonal rotation for the CFA, oblique rotation was used to allow for interpretability of the results. The Quartimin rotation was used in the CFA to confirm the number of factors and their loadings in the EFA exploration. It also serves to uncover more nuanced relationships between the factors and the psychological characteristics they represent compared with the orthogonal, Varimax rotations.

Table S5 shows the indicators of model fit for the final model with each half of the dataset and the full dataset. Table S6 summarizes the final model that resulted from the CFA analyses with factor loadings for the full dataset.

Collinearity diagnostics revealed that the highest variance inflation factor (VIF) score was 5.7 for F3, which falls below the level at which collinearity is considered problematic (1). We also examined condition index values, for which values close to 10 indicate weak dependencies among indicators that could affect regression estimates (2). The highest condition index value in our model is 5.3, again for F3. The proportion of variation was 0.48 for F2, 0.80 for F3, and 0.48 for F4 for this index. Judging from the VIF and condition index diagnostics, there is weak multicollinearity in our model that should not threaten the conclusions we draw from our analyses.

After the factor model was established, we examined the effect of class year, age, sex, and race on the factor estimates. Each of these variables is categorical; thus, we created dummy variables to test the effect of each covariate separately using a  $\chi^2$  test. The effect each covariate was significant based on a  $\chi^2$  test of difference in which the effect of the covariate restricted to zero was compared with the estimation of the effect of the covariate. Thus, factor scores for each cadet were estimated based on their class year, age, sex, and race, as well as their responses to the 24 items regarding reasons for attending West Point. We used the Mplus default procedure to estimate the factor scores.

Data were gathered from cadets to indicate their sex, age, race, high school grades, SAT score, parental income level and military service, and religion. Cadets must graduate from West Point to become commissioned officers. Data were gathered from the institution indicating cadets' commission status, retention as military officers following their 5-y mandatory period of military service following graduation into years 6, 7, 8, 9, 10, and 11, and their selection for consideration for early promotion during their 5-y mandatory period of military service.

**Analytic Approach.** Logistic regression was used to assess two binary outcomes of whether or not a cadet became a commissioned Army officer and whether or not, once an Army officer, was considered for potential early promotion during the 5-y mandatory commitment period. For the analyses predicting officer retention following their 5-y mandatory commitment, we had only yearly retention outcomes available (i.e., no information regarding the day or month of exit). The data itself were discrete even though the actual retention process was continuous; after 5 y, officers could exit the military any time of the year. The complementary log-log model with PROC GENMOD procedure is more appropriate for this type of discrete data than a Cox proportional hazard model with the PROC PHERG procedure (3). The interpretation of coefficients in complementary log-log modeling results is the same as in Cox proportional hazard modeling results. For the logistic regression assessing whether officers were considered for potential early promotion and the survival analysis of officer retention following their 5-y mandatory commitment, we included cadets who made commission and excluded those who did not. Because the analysis was limited to cadets who made commission, potential selection bias applies to the results. To address this bias, inverse probability weighting (IPW) was used. The weight for cadets who made commission was generated based on the probability of making commission from the logistic regression predicting commission. These weights were then incorporated into the analyses of whether officers were considered for potential early promotion and their retention in the military following their mandatory 5 y of service. Dummy codes were used to represent sex (0 = female, 1 = male), age (0 = 19 or younger, 1 = 20 or older), race (0 = non-White, 1 = White), high-school grade average (0 = C or below, 1 = above C), parental income (0 = below \$30,000 a year, 1 = \$30,000 or more a year), religion, and class year. For religion, the reference group was "Other Christian" and separate dummy codes were created for Catholic, Evangelical Protestant, Islamic/Jewish/Buddhist/other, Mainline Protestant, or None. For class year, 2006 was the reference group with dummies for each of the other years. Additional covariates included SAT score. For each analysis, the focal predictors were the standardized latent factor scores for each participant as well as the interaction term of the internal motive (Factor 4) and instrumental motive (Factor 3) factor scores. We expected the interaction term to be negative, indicating that having instrumental motives for attending West Point would decrease the positive impact of having internal motives. For the logistic regression and survival analyses, all estimated factor scores were standardized and multiplicative two-way interaction terms were created using the factor scores indicating the reasons participants chose to attend West Point. To interpret significant interaction effects from these analyses, we estimated the probability of events (making commission or being considered for early promotion) for female participants given their set of factor scores. For the survival analyses with complementary log-log model, we estimated the probability of an event (i.e., exiting the military) occurring for female participants with a given set of factor scores in year 1 ( $P_1$ ), year 2 ( $P_2$ ), year

3 ( $P_3$ ), year 4 ( $P_4$ ), year 5 ( $P_5$ ), and year 6 ( $P_6$ ), respectively, given that the individual did not have events in any of previous years using *Lsmmeans* statement with *ilink* option[1]. The survival probability (probability of retention) for year 1:  $S_1 = (1 - P_1)$ ; for year 2:  $S_2 = S_1(1 - P_2) = (1 - P_1)(1 - P_2)$ ; for year 3:  $S_3 = S_1S_2(1 - P_3) = (1 - P_1)(1 - P_2)(1 - P_3)$ ; for year 4:  $S_4 = S_1S_2S_3(1 - P_4) = (1 - P_1)(1 - P_2)(1 - P_3)(1 - P_4)$ ; for year 5:  $S_5 = S_1S_2S_3S_4(1 - P_5) = (1 - P_1)(1 - P_2)(1 - P_3)(1 - P_4)(1 - P_5)$ ; for year 6:  $S_6 = S_1S_2S_3S_4S_5(1 - P_6) = (1 - P_1)(1 - P_2)(1 - P_3)(1 - P_4)(1 - P_5)(1 - P_6)$ .

## SI Results

Logistic regression results controlling for age, sex, race, high-school grades, SAT score, parental income, religion, and entering year indicated that cadets with stronger internally based reasons for attending West Point were significantly more likely to graduate and become commissioned officers (F4:  $\beta = 0.22$ ,  $P < 0.0001$ ) (see Table S7 for univariate results and Table S8 for the full set of regression results). The results also indicated that cadets with stronger internally based reasons for attending West Point were more likely to extend their service as Army officers beyond the 5-y mandatory period into years 6, 7, 8, 9, 10, and 11. All retention and consideration for promotion analyses used an inverse probability weighting to account for potential bias introduced by including only those cadets who made commission in the analysis for these two outcomes. Survival analysis was used to assess the impact of cadets' reasons for attending West Point on the hazard of quitting the military beyond their mandatory service period (F4:  $\beta = -0.12$ ,  $P = 0.0009$ ) (see Table S9 for univariate analysis of this outcome, and Table S10 for the full set of multivariate results). Finally, logistic regression results controlling for age, sex, race, high-school grades, SAT score, parental income, religion, and entering year indicated that cadets with stronger internally based reasons for attending West Point were significantly more likely to be considered for early career promotions during their mandatory five years of service ( $\beta = 0.20$ ,  $P = 0.0006$ ), an indication of high-level performance (see Table S11 for univariate analysis of this outcome, and Table S12 for the full set of regression results).

The main text describes the results for effects of the interaction of instrumental and internal motives for attending West Point on making commission, retention beyond the 5-y mandatory service period, and being considered for potential early promotion. In all cases, the interaction of these two factor scores was significant (Factor 3  $\times$  Factor 4), although the form of the interaction differed across outcomes. For making commission, the form of the interaction suggests a negative impact of instrumental motives for attending West Point on likelihood of commission at any level of internal motives ( $\beta = -0.07$ ,  $P = 0.0006$ ), an outcome that is consistent with motivational crowding-out. Once this attrition from the institution has occurred, the interaction of these two motives continues to be significant for the likelihood that an officer will remain after serving the 5-y mandatory period in the Army. However, the form of the interaction suggests that instrumental motives for attending West Point make it more likely that officers exit the military following their mandatory service period, except in cases where their internal motives for attending were strongest (F3:  $\beta = 0.16$ ,  $P = 0.0003$ ; F3  $\times$  F4:  $\beta = -0.03$ ,  $P = 0.01$ ). Similarly, the interaction of these two motives is also significant for the likelihood that an officer would be considered for potential early promotion. Officers were less likely to be considered for early promotion in their period of mandatory service to the extent that their instrumental motives reasons for attending West Point were strong but their internal motives were weak (F3:  $\beta = -0.27$ ,  $P < 0.0001$ ; F3  $\times$  F4:  $\beta = 0.06$ ,  $P = 0.04$ ).

1. Kutner MH, Nachtsheim CJ, Neter J (2004) *Applied Linear Regression Models* (McGraw-Hill/Irwin, New York), 4th Ed.
2. Belsey DA, Kuh E, Welsch RE (1980) *Regression Diagnostics: Identifying Influential Data and Sources of Collinearity* (John Wiley and Sons, New York).

3. Allison PD (1995) *Survival Analysis Using SAS: A Practical Guide* (SAS Institute, Cary, NC).

Red Curve Line: Negative Correlation  
Red Direct Line: Negative Loading  
Red Box: Cross Loaded Questions

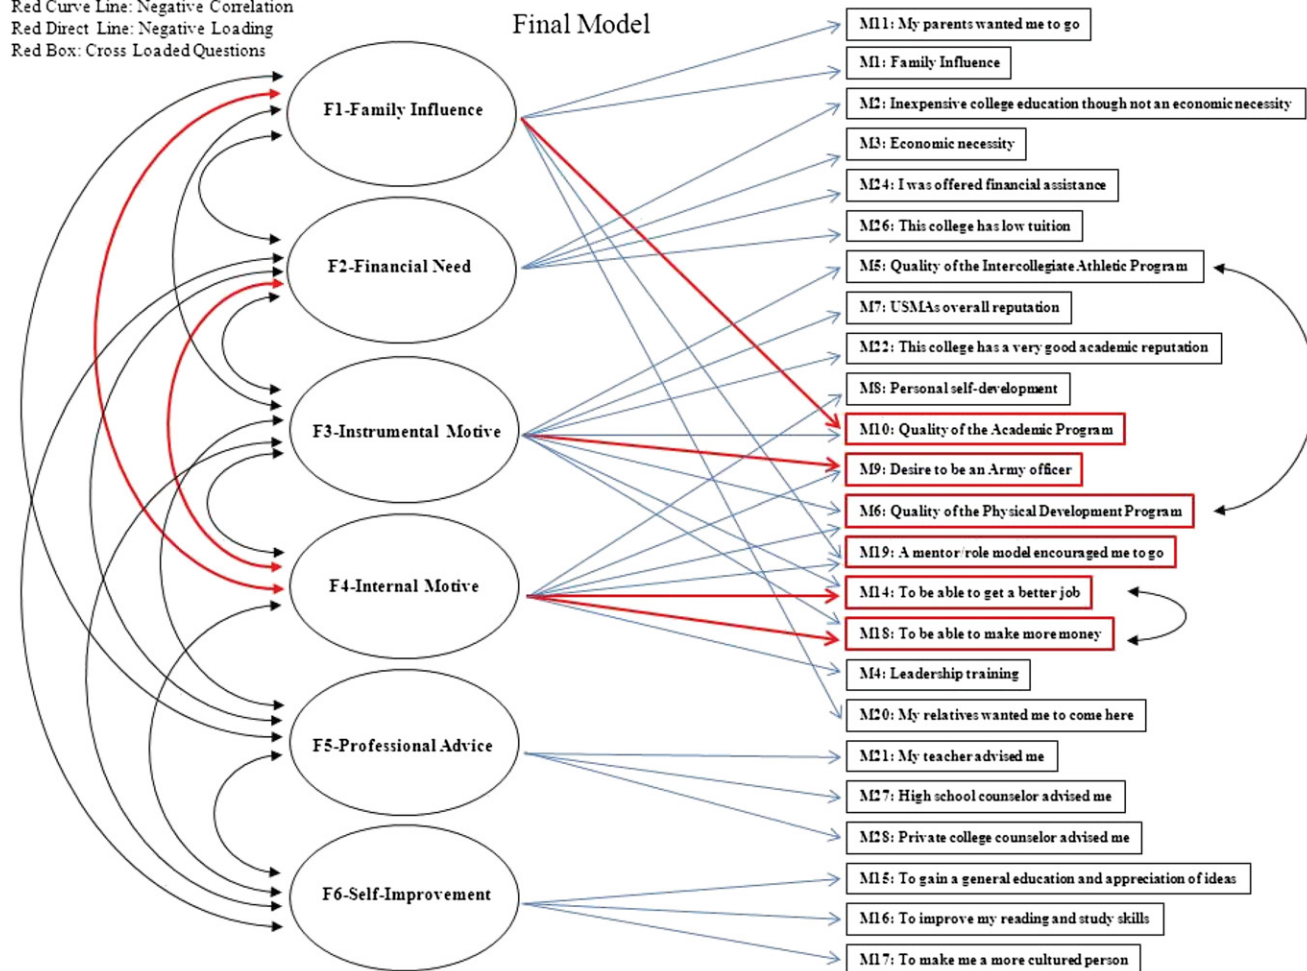

Fig. S1. Confirmatory factor analysis model.

**Table S1. Demographic information stratified by class year**

$n = 10,239$ . Values reported for factor scores reflect mean  $\pm$  SD of the latent factor score. For all analyses, whether participants' parents served in the military was not included as a control variable, as there was extensive missing data for this variable and the participants from whom data for this variable were collected were not a representative set.



**Table S4. Exploratory factor analysis results for both first and second half of dataset**

| Item | Factor 1      | Factor 2      | Factor 3      | Factor 4      | Factor 5      | Factor 6      |
|------|---------------|---------------|---------------|---------------|---------------|---------------|
| M1   | 0.733/0.754   | −0.009/0.076  | 0.070/−0.019  | 0.110/0.02    | −0.024/−0.035 | −0.064/−0.033 |
| M2   | 0.060/0.156   | −0.542/0.548  | 0.077/−0.051  | 0.091/−0.043  | 0.034/−0.036  | −0.016/−0.028 |
| M3   | 0.013/0.033   | −0.510/0.505  | 0.042/0.089   | 0.133/−0.003  | 0.079/0.068   | −0.047/0.008  |
| M4   | −0.085/−0.029 | 0.062/−0.014  | −0.014/−0.13  | −0.819/0.766  | 0.059/−0.025  | 0.026/0.147   |
| M5   | −0.005/−0.035 | 0.041/−0.084  | 0.808/−0.444  | 0.096/0.06    | 0.010/0.254   | −0.010/−0.104 |
| M6   | −0.096/−0.092 | 0.021/−0.113  | 0.506/−0.447  | −0.396/0.403  | 0.061/0.228   | 0.052/−0.045  |
| M7   | 0.285/0.168   | −0.092/0.129  | 0.072/−0.464  | −0.503/0.242  | −0.240/−0.088 | −0.089/−0.09  |
| M8   | −0.079/−0.047 | 0.016/−0.033  | 0.010/−0.139  | −0.726/0.686  | 0.051/0.002   | 0.126/0.196   |
| M9   | −0.099/−0.095 | 0.128/−0.049  | −0.167/0.073  | −0.565/0.536  | 0.058/−0.058  | −0.055/0.073  |
| M10  | 0.016/−0.055  | −0.092/0.035  | 0.303/−0.613  | −0.402/0.152  | −0.230/−0.021 | 0.069/0.057   |
| M11  | 0.778/0.707   | 0.033/−0.044  | −0.038/−0.046 | −0.016/−0.05  | −0.059/0.042  | 0.026/0.076   |
| M14  | 0.134/−0.01   | −0.237/0.05   | −0.014/−0.408 | 0.048/−0.399  | −0.454/0.019  | 0.352/0.274   |
| M15  | −0.043/0.002  | 0.044/0.017   | −0.064/0.047  | −0.029/0.031  | −0.059/−0.047 | 0.805/0.853   |
| M16  | −0.043/−0.003 | 0.056/0.002   | 0.109/−0.021  | 0.017/0.106   | 0.075/0.076   | 0.783/0.686   |
| M17  | −0.044/−0.003 | 0.038/−0.038  | −0.024/−0.005 | −0.083/0.063  | 0.024/0.045   | 0.666/0.673   |
| M18  | 0.189/0.036   | −0.309/0.098  | 0.037/−0.442  | 0.118/−0.507  | −0.420/0.058  | 0.291/0.249   |
| M19  | 0.443/0.304   | −0.002/−0.013 | −0.032/0.069  | −0.094/0.115  | 0.164/0.265   | 0.165/0.202   |
| M20  | 0.969/0.94    | 0.046/0.005   | −0.005/0.027  | 0.054/−0.004  | 0.002/0.045   | −0.063/−0.02  |
| M21  | 0.549/0.286   | −0.158/−0.017 | 0.037/−0.021  | −0.029/−0.054 | 0.457/0.678   | 0.140/0.014   |
| M22  | 0.212/0.108   | −0.173/0.143  | 0.139/−0.607  | −0.375/0.066  | −0.365/−0.098 | 0.142/0.091   |
| M24  | −0.088/−0.008 | −0.870/0.77   | 0.004/−0.009  | 0.028/−0.01   | −0.002/0.049  | −0.046/−0.002 |
| M26  | −0.045/−0.048 | −0.745/0.736  | −0.092/−0.007 | −0.037/0.038  | 0.011/0.034   | −0.038/−0.007 |
| M27  | 0.335/0.033   | −0.281/0.041  | 0.084/−0.024  | −0.060/−0.024 | 0.482/0.809   | 0.133/−0.007  |
| M28  | 0.191/−0.115  | −0.231/0.121  | 0.050/0.094   | −0.102/0.03   | 0.469/0.715   | 0.064/0.026   |

*n* = 5,120 for first table entry, *n* = 5,119 for second table entry. Entries reflect quartimin rotated loadings.

**Table S5. Tests of final model fit**

| Test                                    | First half of data | Second half of data | Full dataset |
|-----------------------------------------|--------------------|---------------------|--------------|
| Comparative Fit Index (CFI)             | 0.950              | 0.955               | 0.953        |
| Tucker Lewis Index (TLI)                | 0.958              | 0.963               | 0.961        |
| Root mean square error of approximation | 0.044              | 0.041               | 0.042        |

$n = 5,120$  for first half of data,  $n = 5,119$  for second half of data,  $n = 10,239$  for full data set. Entries reflect quartimin rotated loadings.

**Table S6. Factor loadings for all items based on confirmatory factor analysis**

| Reason for attending West Point                                     | Item | Factor 1 | Factor 2 | Factor 3 | Factor 4 | Factor 5 | Factor 6 |
|---------------------------------------------------------------------|------|----------|----------|----------|----------|----------|----------|
| Family influence                                                    | M1   | 0.761    |          |          |          |          |          |
| Inexpensive college education although not<br>an economic necessity | M2   |          | 0.663    |          |          |          |          |
| Economic necessity                                                  | M3   |          | 0.548    |          |          |          |          |
| Leadership training                                                 | M4   |          |          |          | 0.852    |          |          |
| Quality of the intercollegiate athletic program                     | M5   |          |          | 0.291    |          |          |          |
| Quality of the physical development program                         | M6   |          |          | 0.179    | 0.462    |          |          |
| USMA's overall reputation                                           | M7   |          |          | 0.480    |          |          |          |
| Personal self-development                                           | M8   |          |          |          | 0.823    |          |          |
| Desire to be an Army officer                                        | M9   |          |          | −0.325   | 0.717    |          |          |
| Quality of the academic program                                     | M10  | −0.241   |          | 0.688    |          |          |          |
| My parents wanted me to go                                          | M11  | 0.737    |          |          |          |          |          |
| To be able to get a better job                                      | M14  |          |          | 0.536    | −0.221   |          |          |
| To gain a general education and appreciation of ideas               | M15  |          |          |          |          |          | 0.787    |
| To improve my reading and study skills                              | M16  |          |          |          |          |          | 0.785    |
| To make me a more cultured person                                   | M17  |          |          |          |          |          | 0.700    |
| To be able to make more money                                       | M18  |          |          | 0.690    | −0.453   |          |          |
| A mentor/role model encouraged me to go                             | M19  | 0.553    |          |          | 0.295    |          |          |
| My relatives wanted me to come here                                 | M20  | 0.947    |          |          |          |          |          |
| My teacher advised me                                               | M21  |          |          |          |          | 0.934    |          |
| This college has a very good academic reputation                    | M22  |          |          | 0.687    |          |          |          |
| I was offered financial assistance                                  | M24  |          | 0.789    |          |          |          |          |
| This college has low tuition                                        | M26  |          | 0.673    |          |          |          |          |
| High school counselor advised me                                    | M27  |          |          |          |          | 0.767    |          |
| Private college counselor advised me                                | M28  |          |          |          |          | 0.580    |          |

*n* = 10,239.

**Table S7. Univariate analysis results for commission outcome**

| Attribute                           | Commissioned<br>( <i>n</i> = 7,868) | Not Commissioned<br>( <i>n</i> = 2,371) | <i>P</i> |
|-------------------------------------|-------------------------------------|-----------------------------------------|----------|
| Sex                                 |                                     |                                         | 0.0001   |
| Male                                | 6,738 (77.5)                        | 1,956 (22.5)                            |          |
| Female                              | 1,130 (73.2)                        | 414 (26.8)                              |          |
| Missing                             | 0 (0.0)                             | 1 (100.0)                               |          |
| Age                                 |                                     |                                         | <0.0001  |
| 19 or younger                       | 6,855 (77.5)                        | 1,986 (22.5)                            |          |
| 20 or older                         | 1,004 (72.5)                        | 381 (27.5)                              |          |
| Missing                             | 9 (69.2)                            | 4 (30.8)                                |          |
| Race                                |                                     |                                         | 0.0004   |
| White                               | 6,248 (77.6)                        | 1,803 (22.4)                            |          |
| Non-White                           | 1,620 (74.0)                        | 568 (26.0)                              |          |
| High-school grade                   |                                     |                                         | <0.0001  |
| C or below                          | 114 (64.8)                          | 62 (35.2)                               |          |
| Above C                             | 7,710 (77.1)                        | 2,295 (22.9)                            |          |
| Missing                             | 44 (75.9)                           | 14 (24.1)                               |          |
| SAT total score                     | 1,246 ± 117.6                       | 1,229 ± 117.5                           | <0.0001  |
| Parental income                     |                                     |                                         | <0.0001  |
| Less than \$30,000 a year           | 666 (69.6)                          | 291 (30.4)                              |          |
| \$30,000 or higher a year           | 7,008 (77.7)                        | 2,017 (22.3)                            |          |
| Missing                             | 194 (75.5)                          | 63 (24.5)                               |          |
| Parents in the military             |                                     |                                         | 0.3187   |
| Neither parent in military          | 2,984 (76.4)                        | 920 (23.6)                              |          |
| At least one parent in military     | 2,792 (77.6)                        | 806 (22.4)                              |          |
| Missing                             | 2,092 (76.4)                        | 645 (23.6)                              |          |
| Religion                            |                                     |                                         | <0.0001  |
| Catholic                            | 2,714 (78.6)                        | 741 (21.4)                              |          |
| Evangelical Protestant              | 1,030 (74.5)                        | 352 (25.5)                              |          |
| Mainline Protestant                 | 1,876 (79.9)                        | 473 (20.1)                              |          |
| Other Christian                     | 1,194 (74.2)                        | 415 (25.8)                              |          |
| Islamic, Jewish, Buddhist, or other | 278 (71.8)                          | 109 (28.2)                              |          |
| None                                | 704 (73.3)                          | 257 (26.7)                              |          |
| Missing                             | 72 (75.0)                           | 24 (25.0)                               |          |
| F1-Family Influence Factor Score    | −0.05 ± 0.97                        | 0.15 ± 1.08                             | <0.0001  |
| F2-Financial Need Factor Score      | −0.03 ± 0.99                        | 0.11 ± 1.02                             | <0.0001  |
| F3-Instrumental Motive Factor Score | 0.02 ± 0.99                         | −0.06 ± 1.05                            | 0.0004   |
| F4-Internal Motive Factor Score     | 0.06 ± 0.96                         | −0.20 ± 1.09                            | <0.0001  |
| F5-Professional Advice Factor Score | −0.03 ± 0.97                        | 0.08 ± 1.08                             | <0.0001  |
| F6-Self-Improvement Factor Score    | 0.02 ± 0.99                         | −0.08 ± 1.04                            | <0.0001  |
| Year of class                       |                                     |                                         | <0.0001  |
| Class of 1997                       | 829 (75.9)                          | 263 (24.1)                              |          |
| Class of 1998                       | 834 (77.2)                          | 246 (22.8)                              |          |
| Class of 1999                       | 895 (79.0)                          | 238 (21.0)                              |          |
| Class of 2000                       | 890 (79.3)                          | 232 (20.7)                              |          |
| Class of 2001                       | 899 (77.4)                          | 263 (22.6)                              |          |
| Class of 2002                       | 949 (78.0)                          | 268 (22.0)                              |          |
| Class of 2004                       | 866 (76.2)                          | 271 (23.8)                              |          |
| Class of 2005                       | 876 (76.2)                          | 274 (23.8)                              |          |
| Class of 2006                       | 830 (72.4)                          | 316 (27.6)                              |          |

*n* = 10,239.

**Table S8. Logistic regression results for commission outcome**

| Attribute                           | $\beta$ | $p$     |
|-------------------------------------|---------|---------|
| Sex                                 |         |         |
| Male                                | 0.31    | <0.0001 |
| Female                              | Ref     |         |
| Age                                 |         |         |
| 19 or younger                       | 0.21    | 0.11    |
| 20 or older                         | Ref     |         |
| Race                                |         |         |
| Non-White                           | -0.08   | 0.34    |
| White                               | Ref     |         |
| High-school grade                   |         |         |
| Above C                             | 0.51    | <0.0001 |
| C or below                          | Ref     |         |
| SAT total score                     | 0.0009  | 0.0001  |
| Parental Income                     |         |         |
| \$30,000 or higher a year           | 0.35    | <0.0001 |
| Less than \$30,000 a year           | Ref     |         |
| Religion                            |         | <0.0001 |
| Catholic                            | 0.24    | <0.0001 |
| Evangelical Protestant              | 0.20    | 0.005   |
| Islamic, Jewish, Buddhist, or other | -0.13   | 0.31    |
| Mainline Protestant                 | 0.33    | 0.0001  |
| None                                | 0.03    | 0.74    |
| Other Christian                     | Ref     |         |
| F1-Family influence factor score    | -0.02   | 0.67    |
| F2-Financial need factor score      | 0.03    | 0.56    |
| F3-Instrumental motive factor score | -0.07   | 0.37    |
| F4-Internal motive factor score     | 0.22    | <0.0001 |
| F5-Professional advice factor score | -0.12   | <0.0001 |
| F6-Self-improvement factor score    | 0.06    | 0.20    |
| F1 $\times$ F4                      | 0.06    | 0.03    |
| F2 $\times$ F4                      | 0.01    | 0.44    |
| F3 $\times$ F4                      | -0.07   | 0.0006  |
| F5 $\times$ F4                      | 0.03    | 0.16    |
| Year of Class                       |         | <0.0001 |
| Class of 1997                       | 0.27    | <0.0001 |
| Class of 1998                       | 0.37    | <0.0001 |
| Class of 1999                       | 0.37    | <0.0001 |
| Class of 2000                       | 0.49    | <0.0001 |
| Class of 2001                       | 0.34    | <0.0001 |
| Class of 2002                       | 0.28    | <0.0001 |
| Class of 2004                       | 0.15    | <0.0001 |
| Class of 2005                       | 0.14    | <0.0001 |
| Class of 2006                       | Ref     |         |

Ref refers to this group or category being used as the comparison group in analyses that employ dummy variables.  $n = 10,239$ .

**Table S9. Univariate analysis results for exit from military**

| Attribute                           | Yes, event (left military)<br>( <i>n</i> = 4,664) | Censored (stay in the military<br>during follow-up time) ( <i>n</i> = 2,999) | <i>P</i> |
|-------------------------------------|---------------------------------------------------|------------------------------------------------------------------------------|----------|
| Sex                                 |                                                   |                                                                              | <0.0001  |
| Male                                | 3,935 (59.5)                                      | 2,676 (40.5)                                                                 |          |
| Female                              | 729 (69.3)                                        | 323 (30.7)                                                                   |          |
| Age                                 |                                                   |                                                                              | 0.0018   |
| 19 or younger                       | 4,101 (61.5)                                      | 2,563 (38.5)                                                                 |          |
| 20 or older                         | 555 (56.1)                                        | 435 (43.9)                                                                   |          |
| Missing                             | 8 (88.9)                                          | 1 (11.1)                                                                     |          |
| Race                                |                                                   |                                                                              | 0.6795   |
| White                               | 3,716 (61.0)                                      | 2,374 (39.0)                                                                 |          |
| Non-White                           | 948 (60.3)                                        | 625 (39.7)                                                                   |          |
| High-school grade                   |                                                   |                                                                              | 0.3277   |
| C or below                          | 62 (55.4)                                         | 50 (44.6)                                                                    |          |
| Above C                             | 4,578 (61.0)                                      | 2,930 (39.0)                                                                 |          |
| Missing                             | 24 (55.8)                                         | 19 (44.2)                                                                    |          |
| SAT total score                     | 1,239 ± 116.7                                     | 1,252 ± 117.1                                                                | 0.0026   |
| Parental income                     |                                                   |                                                                              | <0.0001  |
| Less than \$30,000 a year           | 386 (58.9)                                        | 269 (41.1)                                                                   |          |
| \$30,000 or higher a year           | 4,172 (61.2)                                      | 2,649 (38.8)                                                                 |          |
| Missing                             | 106 (56.7)                                        | 81 (43.3)                                                                    |          |
| Parents in the military             |                                                   |                                                                              | <0.0001  |
| Neither parent in military          | 1,767 (61.0)                                      | 1,132 (39.0)                                                                 |          |
| At least one parent in military     | 1,610 (59.5)                                      | 1,098 (40.5)                                                                 |          |
| Missing                             | 1,287 (62.6)                                      | 769 (37.4)                                                                   |          |
| Religion                            |                                                   |                                                                              | <0.0001  |
| Catholic                            | 1,669 (63.1)                                      | 978 (36.9)                                                                   |          |
| Evangelical Protestant              | 594 (59.0)                                        | 412 (41.0)                                                                   |          |
| Mainline Protestant                 | 1,104 (60.2)                                      | 729 (39.8)                                                                   |          |
| Other Christian                     | 659 (57.3)                                        | 492 (42.7)                                                                   |          |
| Islamic, Jewish, Buddhist, or other | 174 (64.4)                                        | 96 (35.6)                                                                    |          |
| None                                | 422 (61.7)                                        | 262 (38.3)                                                                   |          |
| Missing                             | 42 (58.3)                                         | 30 (41.7)                                                                    |          |
| F1-Family influence factor score    | −0.01 ± 0.98                                      | −0.11 ± 0.96                                                                 | 0.0034   |
| F2-Financial need factor score      | −0.01 ± 0.99                                      | −0.07 ± 0.99                                                                 | 0.0230   |
| F3-Instrumental motive factor score | 0.08 ± 0.97                                       | −0.08 ± 1.02                                                                 | 0.0001   |
| F4-Internal motive factor score     | 0.03 ± 0.98                                       | 0.10 ± 0.94                                                                  | 0.0457   |
| F5-Professional advice factor score | −0.01 ± 0.97                                      | −0.04 ± 0.98                                                                 | 0.2656   |
| F6-Self-improvement factor score    | 0.07 ± 0.99                                       | −0.05 ± 0.98                                                                 | 0.0909   |
| Year of class                       |                                                   |                                                                              | <0.0001  |
| Class of 1997                       | 514 (63.4)                                        | 297 (36.6)                                                                   |          |
| Class of 1998                       | 522 (63.7)                                        | 298 (36.3)                                                                   |          |
| Class of 1999                       | 577 (65.8)                                        | 300 (34.2)                                                                   |          |
| Class of 2000                       | 597 (68.2)                                        | 279 (31.8)                                                                   |          |
| Class of 2001                       | 591 (66.9)                                        | 292 (33.1)                                                                   |          |
| Class of 2002                       | 904 (97.9)                                        | 19 (2.1)                                                                     |          |
| Class of 2004                       | 442 (52.4)                                        | 401 (47.6)                                                                   |          |
| Class of 2005                       | 314 (37.5)                                        | 523 (62.5)                                                                   |          |
| Class of 2006                       | 203 (25.6)                                        | 590 (74.4)                                                                   |          |

$n = 7,663$ .

| Attribute                           | $\beta$ | $P$     |
|-------------------------------------|---------|---------|
| Sex                                 |         |         |
| Male                                | -0.20   | <0.0001 |
| Female                              | Ref     |         |
| Age                                 |         |         |
| 19 or younger                       | 0.10    | 0.01    |
| 20 or older                         | Ref     |         |
| Race                                |         |         |
| Non-White                           | 0.04    | 0.23    |
| White                               | Ref     |         |
| High-school grade                   |         |         |
| Above C                             | 0.05    | 0.65    |
| C or below                          | Ref     |         |
| SAT total score                     | -0.0005 | 0.003   |
| Parental income                     |         |         |
| \$30,000 or higher a year           | 0.13    | 0.0004  |
| Less than \$30,000 a year           | Ref     |         |
| Religion                            |         | <0.0001 |
| Catholic                            | 0.15    | <0.0001 |
| Evangelical Protestant              | 0.03    | 0.50    |
| Islamic, Jewish, Buddhist, or other | 0.32    | <0.0001 |
| Mainline Protestant                 | 0.13    | <0.0001 |
| None                                | 0.15    | 0.03    |
| Other Christian                     | Ref     | Ref     |
| F1-Family Influence Factor Score    | -0.008  | 0.68    |
| F2-Financial Need Factor Score      | -0.05   | 0.01    |
| F3-Instrumental Motive Factor Score | 0.16    | 0.0003  |
| F4-Internal Motive Factor Score     | -0.12   | 0.0009  |
| F5-Professional Advice Factor Score | -0.02   | 0.12    |
| F6-Self-Improvement Factor Score    | -0.04   | 0.06    |
| F1 $\times$ F4                      | -0.1    | 0.04    |
| F2 $\times$ F4                      | -0.04   | 0.41    |
| F3 $\times$ F4                      | -0.11   | 0.01    |
| F5 $\times$ F4                      | 0.10    | 0.08    |
| Retention                           |         | <0.0001 |
| First year after 5-y commitment     | Ref     |         |
| Second year after 5-y commitment    | -0.02   | 0.92    |
| Third year after 5-y commitment     | -0.71   | <0.0001 |
| Fourth year after 5-y commitment    | -0.71   | <0.0001 |
| Fifth year after 5-y commitment     | -1.10   | <0.0001 |
| Sixth year after 5-y commitment     | -0.05   | 0.96    |
| Year of class                       |         | <0.0001 |
| Class of 1997                       | 0.49    | <0.0001 |
| Class of 1998                       | 0.56    | <0.0001 |
| Class of 1999                       | 0.62    | <0.0001 |
| Class of 2000                       | 0.74    | <0.0001 |
| Class of 2001                       | 0.72    | <0.0001 |
| Class of 2002                       | 1.13    | <0.0001 |
| Class of 2004                       | 0.52    | <0.0001 |
| Class of 2005                       | 0.34    | <0.0001 |
| Class of 2006                       | Ref     |         |

Ref refers to this group or category being used as the comparison group in analyses that employ dummy variables.  $n = 7,663$ .

**Table S11. Univariate analysis results for being considered for potential early promotion**

| Attribute                           | Considered for potential<br>early promotion ( <i>n</i> = 2,565) | Not considered for potential<br>early promotion ( <i>n</i> = 3,597) | <i>P</i> |
|-------------------------------------|-----------------------------------------------------------------|---------------------------------------------------------------------|----------|
| Sex                                 |                                                                 |                                                                     | <0.0001  |
| Male                                | 2,290 (43.2)                                                    | 3,007 (56.8)                                                        |          |
| Female                              | 275 (31.8)                                                      | 590 (68.2)                                                          |          |
| Age                                 |                                                                 |                                                                     | 0.0046   |
| 19 or younger                       | 2,182 (40.8)                                                    | 3,163 (59.2)                                                        |          |
| 20 or older                         | 381 (47.1)                                                      | 428 (52.9)                                                          |          |
| Missing                             | 2 (25.0)                                                        | 6 (75.0)                                                            |          |
| Race                                |                                                                 |                                                                     | 0.9697   |
| White                               | 2,043 (41.4)                                                    | 2,893 (58.6)                                                        |          |
| Non-White                           | 522 (42.6)                                                      | 704 (57.4)                                                          |          |
| High-school grade                   |                                                                 |                                                                     | 0.1586   |
| C or below                          | 46 (50.5)                                                       | 45 (49.5)                                                           |          |
| Above C                             | 2,508 (41.5)                                                    | 3,529 (58.5)                                                        |          |
| Missing                             | 11 (32.4)                                                       | 23 (67.6)                                                           |          |
| SAT total score                     | 1,242 ± 117.4                                                   | 1,238 ± 117.4                                                       | 0.0490   |
| Parental income                     |                                                                 |                                                                     | <0.0001  |
| Less than \$30,000 a year           | 281 (47.9)                                                      | 306 (52.1)                                                          |          |
| \$30,000 or higher a year           | 2,224 (41.0)                                                    | 3,204 (59.0)                                                        |          |
| Missing                             | 60 (40.8)                                                       | 87 (59.2)                                                           |          |
| Parents in the military             |                                                                 |                                                                     | 0.0125   |
| Neither parent in military          | 796 (38.4)                                                      | 1,278 (61.6)                                                        |          |
| At least one parent in military     | 887 (43.1)                                                      | 1,172 (56.9)                                                        |          |
| Missing                             | 882 (43.5)                                                      | 1,147 (56.5)                                                        |          |
| Religion                            |                                                                 |                                                                     | <0.0001  |
| Catholic                            | 827 (38.9)                                                      | 1,297 (61.1)                                                        |          |
| Evangelical Protestant              | 373 (45.5)                                                      | 446 (54.5)                                                          |          |
| Mainline Protestant                 | 618 (41.4)                                                      | 875 (58.6)                                                          |          |
| Other Christian                     | 420 (45.9)                                                      | 495 (54.1)                                                          |          |
| Islamic, Jewish, Buddhist, or other | 75 (36.2)                                                       | 132 (63.8)                                                          |          |
| None                                | 229 (41.9)                                                      | 317 (58.1)                                                          |          |
| Missing                             | 23 (39.7)                                                       | 35 (60.3)                                                           |          |
| F1-Family influence factor score    | −0.06 ± 0.94                                                    | 0.01 ± 0.98                                                         | 0.0084   |
| F2-Financial need factor score      | −0.05 ± 0.98                                                    | −0.02 ± 0.99                                                        | 0.0185   |
| F3-Instrumental motive factor score | −0.01 ± 1.01                                                    | 0.09 ± 0.96                                                         | <0.0001  |
| F4-Internal motive factor score     | 0.07 ± 0.96                                                     | 0.02 ± 0.97                                                         | 0.0882   |
| F5-Professional advice factor score | 0.01 ± 0.97                                                     | 0.00 ± 0.98                                                         | 0.7405   |
| F6-Self-improvement factor score    | 0.00 ± 0.99                                                     | 0.06 ± 0.98                                                         | 0.1080   |
| Year of class                       |                                                                 |                                                                     | <0.0001  |
| Class of 1997                       | 370 (44.6)                                                      | 459 (55.4)                                                          |          |
| Class of 1998                       | 354 (42.4)                                                      | 480 (57.6)                                                          |          |
| Class of 1999                       | 363 (40.6)                                                      | 532 (59.4)                                                          |          |
| Class of 2000                       | 338 (38.0)                                                      | 552 (62.0)                                                          |          |
| Class of 2001                       | 384 (42.7)                                                      | 515 (57.3)                                                          |          |
| Class of 2002                       | 356 (37.5)                                                      | 593 (62.5)                                                          |          |
| Class of 2004                       | 400 (46.2)                                                      | 466 (53.8)                                                          |          |

 $n = 6,162.$

**Table S12. Logistic regression results for being considered for potential early promotion**

| Attribute                           | $\beta$ | $p$     |
|-------------------------------------|---------|---------|
| Sex                                 |         |         |
| Male                                | 0.38    | <0.0001 |
| Female                              | Ref     |         |
| Age                                 |         |         |
| 19 or younger                       | -0.10   | 0.06    |
| 20 or older                         | Ref     |         |
| Race                                |         |         |
| Non-White                           | -0.11   | 0.04    |
| White                               | Ref     |         |
| High-school grade                   |         |         |
| Above C                             | -0.23   | 0.13    |
| C or below                          | Ref     |         |
| SAT total score                     | 0.0003  | 0.07    |
| Parental income                     |         |         |
| \$30,000 or higher a year           | -0.21   | 0.01    |
| Less than \$30,000 a year           | Ref     |         |
| Religion                            |         | <0.0001 |
| Catholic                            | -0.24   | <0.0001 |
| Evangelical Protestant              | 0.004   | 0.97    |
| Islamic, Jewish, Buddhist, or other | -0.52   | <0.0001 |
| Mainline Protestant                 | -0.20   | 0.002   |
| None                                | -0.16   | 0.08    |
| Other Christian                     | Ref     |         |
| F1-Family influence factor score    | -0.01   | 0.76    |
| F2-Economic need factor score       | 0.09    | <0.0001 |
| F3-Instrumental motive factor score | -0.27   | <0.0001 |
| F4-Internal motive factor score     | 0.20    | 0.0006  |
| F5-Professional advice factor score | 0.06    | 0.01    |
| F6-Self-improvement factor score    | 0.06    | 0.09    |
| F1 $\times$ F4                      | 0.07    | 0.02    |
| F2 $\times$ F4                      | 0.01    | 0.88    |
| F3 $\times$ F4                      | 0.06    | 0.04    |
| F5 $\times$ F4                      | -0.07   | 0.004   |
| Year of class                       |         | <0.0001 |
| Class of 1997                       | -0.002  | 0.87    |
| Class of 1998                       | -0.19   | <0.0001 |
| Class of 1999                       | -0.23   | <0.0001 |
| Class of 2000                       | -0.35   | <0.0001 |
| Class of 2001                       | -0.15   | <0.0001 |
| Class of 2002                       | -0.31   | <0.0001 |
| Class of 2004                       | Ref     |         |

Ref refers to this group or category being used as the comparison group in analyses that employ dummy variables.  $n = 6,162$ .
